# Supplementary material
Source: publisher figshare collection journal article supplement (https://acs.figshare.com/ndownloader/files/13878041)
Supplement: Supplementary file 1 [file 13878041]

---

## Supporting Information

### Efficient ketose production by hydroxyapatite catalyst in a continuous flow module

Kaho Usami, Kejing Xiao, and Akimitsu Okamoto\*

#### Table of Contents

|                                                                                                                                 |     |
|---------------------------------------------------------------------------------------------------------------------------------|-----|
| Figure S1. A full-range $^1\text{H}$ -NMR chart of dihydroxyacetone in $\text{D}_2\text{O}$ .                                   | S2  |
| Figure S2. A full-range $^1\text{H}$ -NMR chart of $\text{DL}$ -glyceraldehyde in $\text{D}_2\text{O}$ .                        | S3  |
| Figure S3. A full-range $^1\text{H}$ -NMR chart of glycolaldehyde in $\text{D}_2\text{O}$ .                                     | S4  |
| Figure S4. A full-range $^1\text{H}$ -NMR chart of erythrose in $\text{D}_2\text{O}$ .                                          | S5  |
| Figure S5. A full-range $^1\text{H}$ -NMR chart of erythrulose in $\text{D}_2\text{O}$ .                                        | S6  |
| Figure S6. A full-range $^1\text{H}$ -NMR chart of ribose in $\text{D}_2\text{O}$ .                                             | S7  |
| Figure S7. A full-range $^1\text{H}$ -NMR chart of ribulose in $\text{D}_2\text{O}$ .                                           | S8  |
| Figure S8. A full-range $^1\text{H}$ -NMR chart of glucose in $\text{D}_2\text{O}$ .                                            | S9  |
| Figure S9. A full-range $^1\text{H}$ -NMR chart of fructose in $\text{D}_2\text{O}$ .                                           | S10 |
| Figure S10. A full-range $^1\text{H}$ -NMR chart of the reaction products in entry 5 of Table 1.                                | S11 |
| Figure S11. A full-range $^1\text{H}$ -NMR chart of the reaction products in entry 3 of Table 1 (entry 1 of Table 2).           | S12 |
| Figure S12. A full-range $^1\text{H}$ -NMR chart of the reaction products in entry 2 of Table 2.                                | S13 |
| Figure S13. A full-range $^1\text{H}$ -NMR chart of the reaction products in entry 3 of Table 2.                                | S14 |
| Figure S14. A full-range $^1\text{H}$ -NMR chart of the reaction products in entry 4 of Table 2.                                | S15 |
| Figure S15. A full-range $^1\text{H}$ -NMR chart of the reaction products in entry 4 of Table 3.                                | S16 |
| Figure S16. A full-range $^1\text{H}$ -NMR chart of the products in the self-aldol reaction of glycolaldehyde.                  | S17 |
| Figure S17. A full-range $^1\text{H}$ -NMR chart of the HAp-catalyzed isomerization of glyceraldehyde in $\text{D}_2\text{O}$ . | S18 |

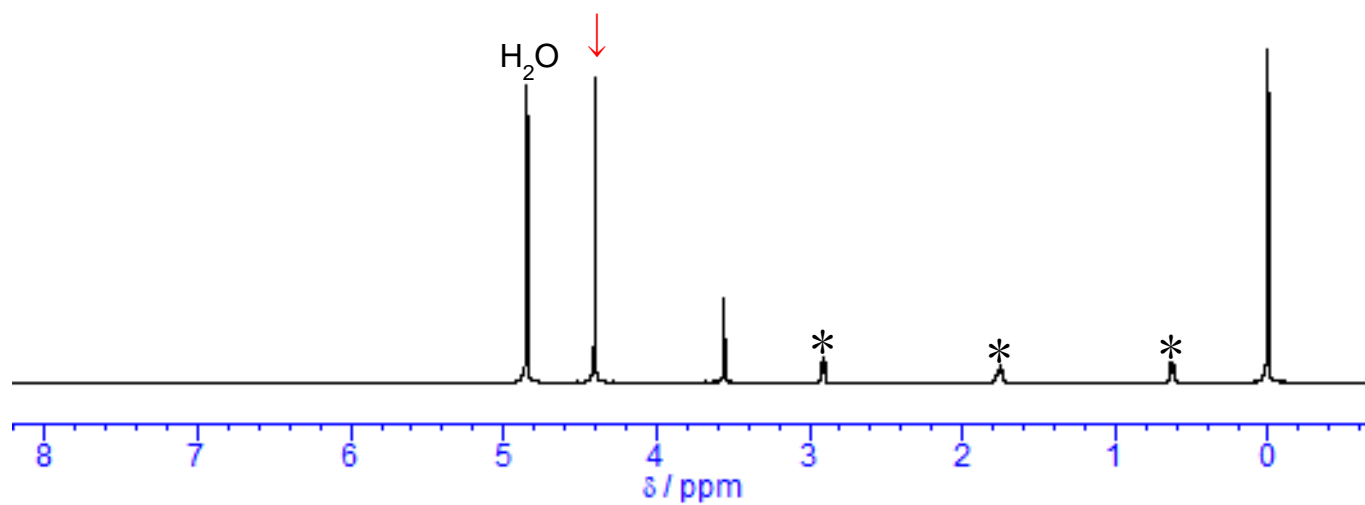

**Figure S1.** A full-range  $^1\text{H}$ -NMR chart of dihydroxyacetone in  $\text{D}_2\text{O}$ . The peaks indicated by \* and a peak at 0 ppm are derived from an internal standard 4,4-dimethyl-4-silapentane-1-sulfonic acid. A red arrow indicates a standard peak used for the calculation of the conversion yield.

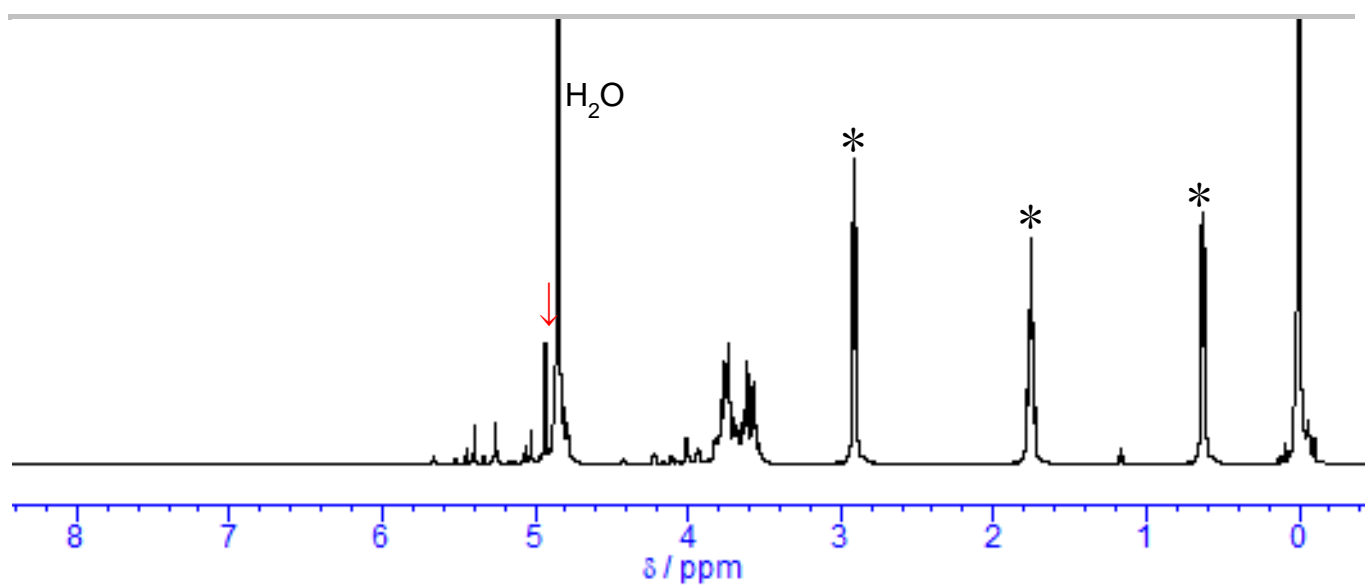

**Figure S2.** A full-range  $^1\text{H}$ -NMR chart of  $\text{DL}$ -glyceraldehyde in  $\text{D}_2\text{O}$ . The peaks indicated by \* and a peak at 0 ppm are derived from an internal standard 4,4-dimethyl-4-silapentane-1-sulfonic acid. A red arrow indicates a standard peak used for the calculation of the conversion yield.

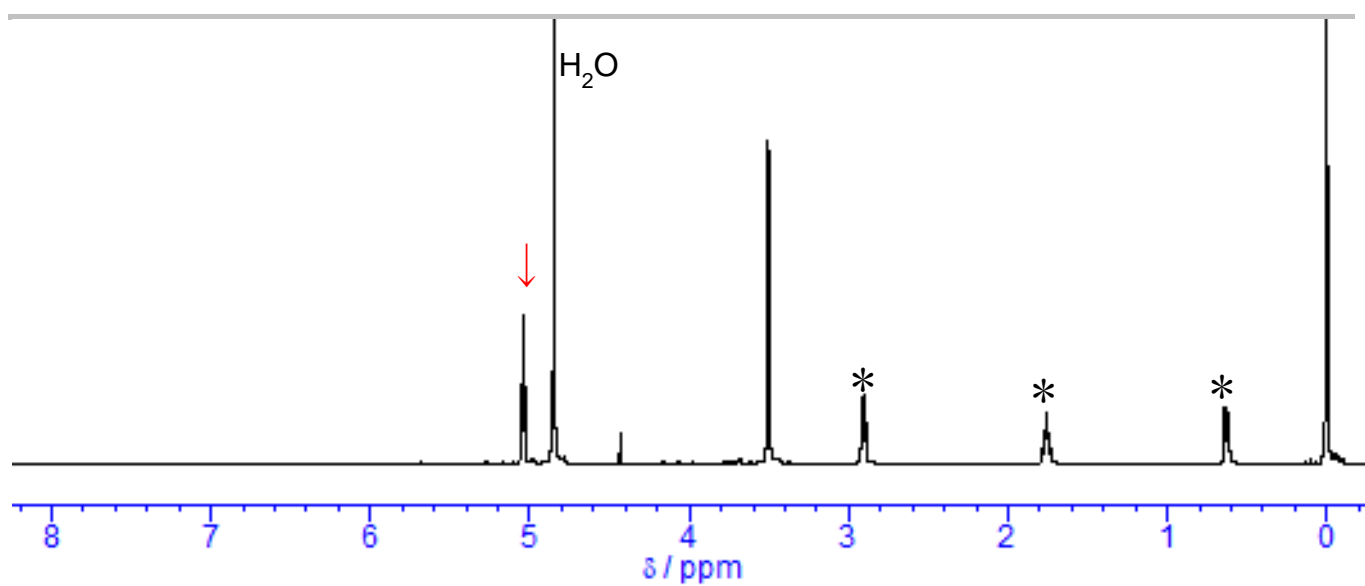

**Figure S3.** A full-range  $^1\text{H}$ -NMR chart of glycolaldehyde in  $\text{D}_2\text{O}$ . The peaks indicated by \* and a peak at 0 ppm are derived from an internal standard 4,4-dimethyl-4-silapentane-1-sulfonic acid. A red arrow indicates a standard peak used for the calculation of the conversion yield.

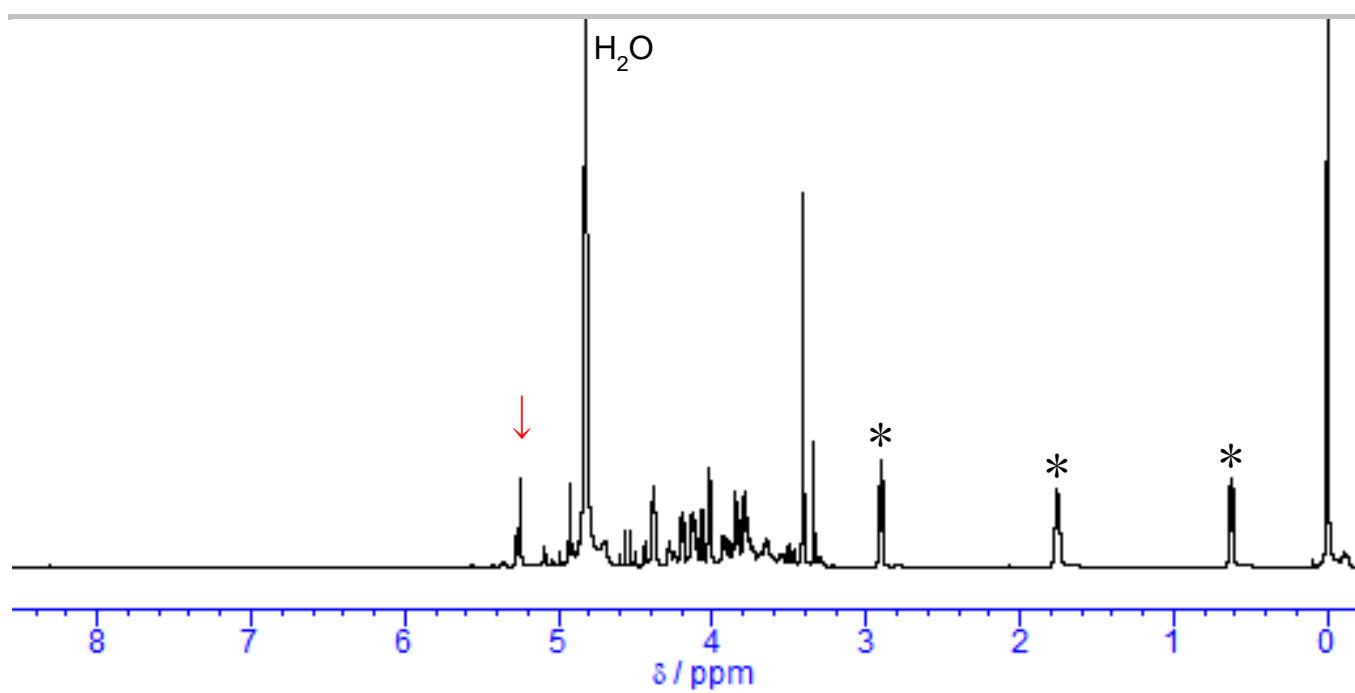

**Figure S4.** A full-range  $^1\text{H}$ -NMR chart of erythrose in  $\text{D}_2\text{O}$ . The peaks indicated by \* and a peak at 0 ppm are derived from an internal standard 4,4-dimethyl-4-silapentane-1-sulfonic acid. A red arrow indicates a standard peak used for the calculation of the conversion yield.

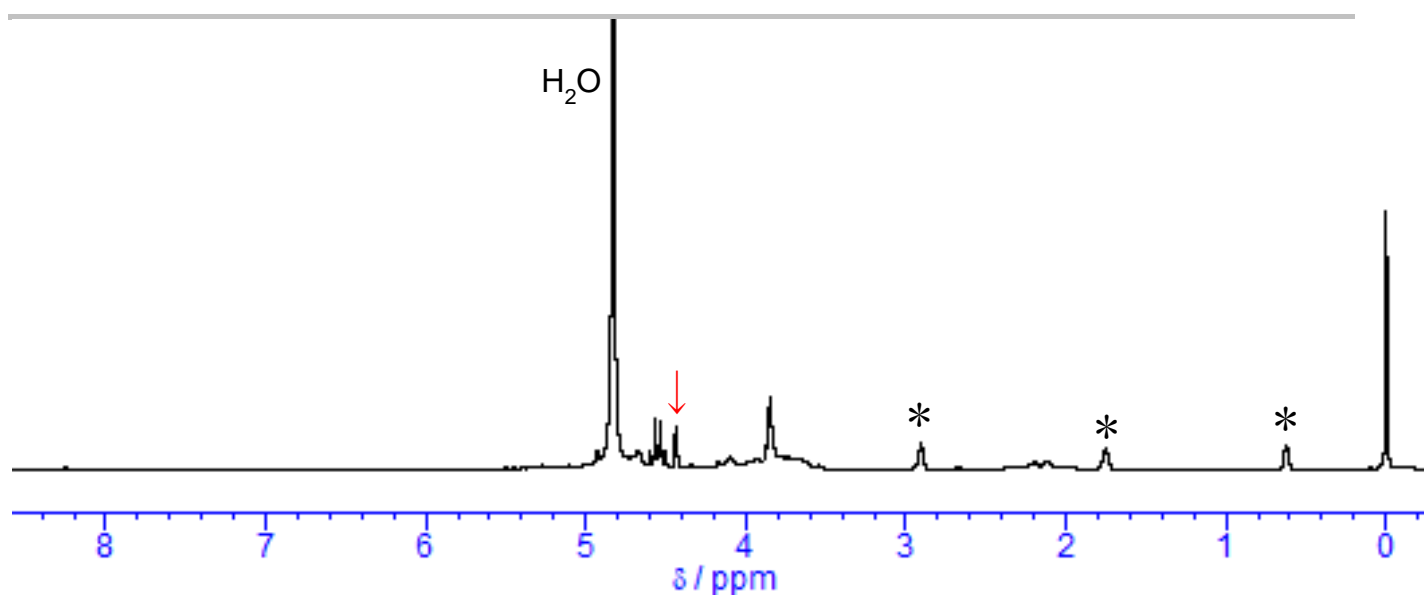

**Figure S5.** A full-range  $^1\text{H}$ -NMR chart of erythrulose in  $\text{D}_2\text{O}$ . The peaks indicated by \* and a peak at 0 ppm are derived from an internal standard 4,4-dimethyl-4-silapentane-1-sulfonic acid. A red arrow indicates a standard peak used for the calculation of the conversion yield.

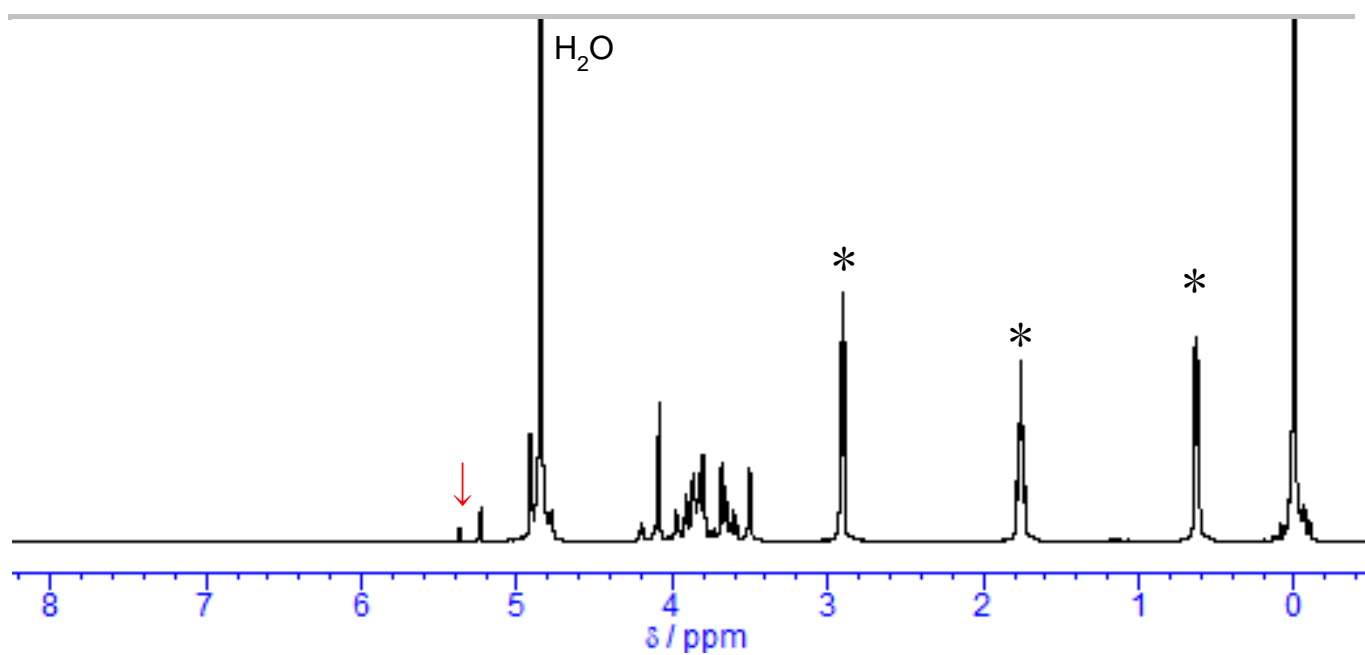

**Figure S6.** A full-range  $^1\text{H}$ -NMR chart of ribose in  $\text{D}_2\text{O}$ . The peaks indicated by \* and a peak at 0 ppm are derived from an internal standard 4,4-dimethyl-4-silapentane-1-sulfonic acid. A red arrow indicates a standard peak used for the calculation of the conversion yield.

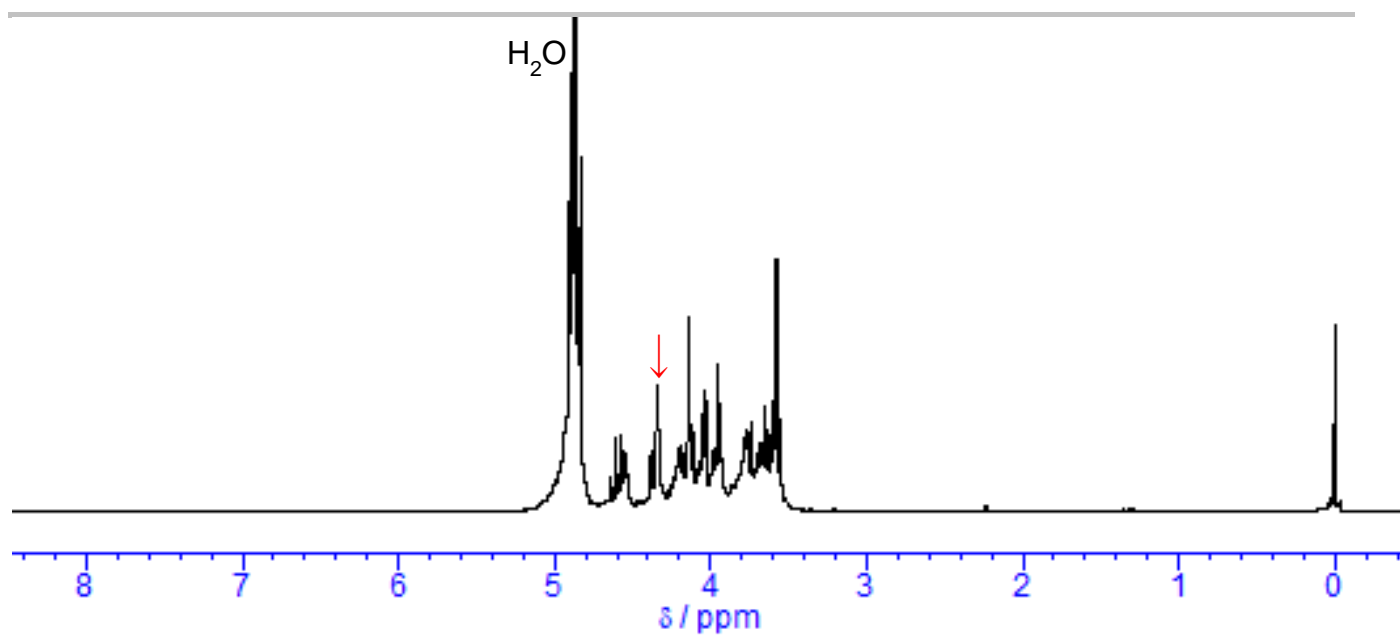

**Figure S7.** A full-range  $^1\text{H}$ -NMR chart of ribulose in  $\text{D}_2\text{O}$ . A red arrow indicates a standard peak used for the calculation of the conversion yield.



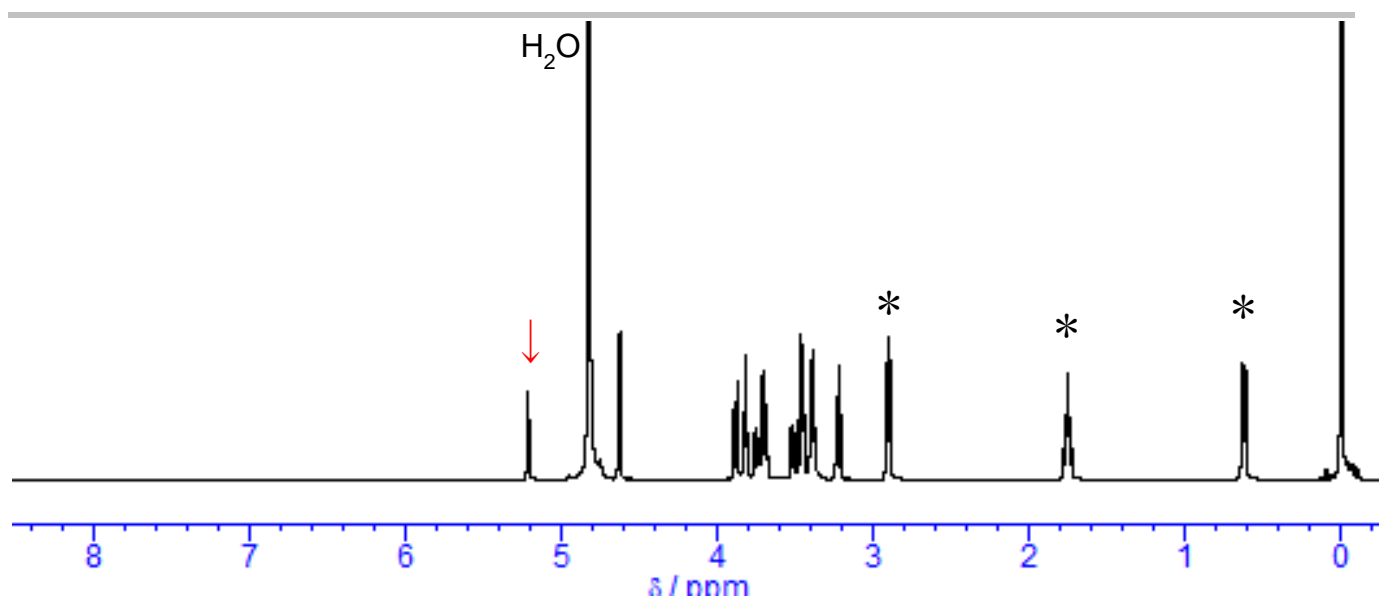

**Figure S8.** A full-range  $^1\text{H}$ -NMR chart of glucose in  $\text{D}_2\text{O}$ . The peaks indicated by \* and a peak at 0 ppm are derived from an internal standard 4,4-dimethyl-4-silapentane-1-sulfonic acid. A red arrow indicates a standard peak used for the calculation of the conversion yield.

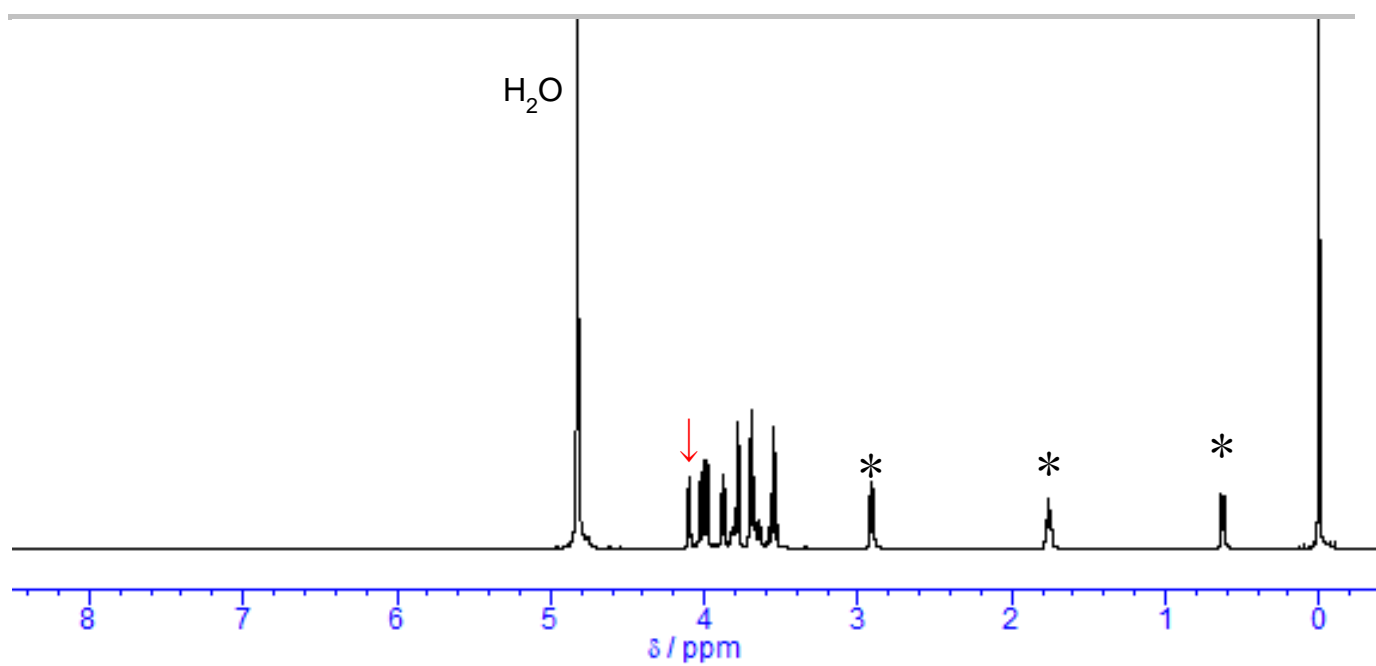

**Figure S9.** A full-range  $^1\text{H}$ -NMR chart of fructose in  $\text{D}_2\text{O}$ . The peaks indicated by \* and a peak at 0 ppm are derived from an internal standard 4,4-dimethyl-4-silapentane-1-sulfonic acid. A red arrow indicates a standard peak used for the calculation of the conversion yield.

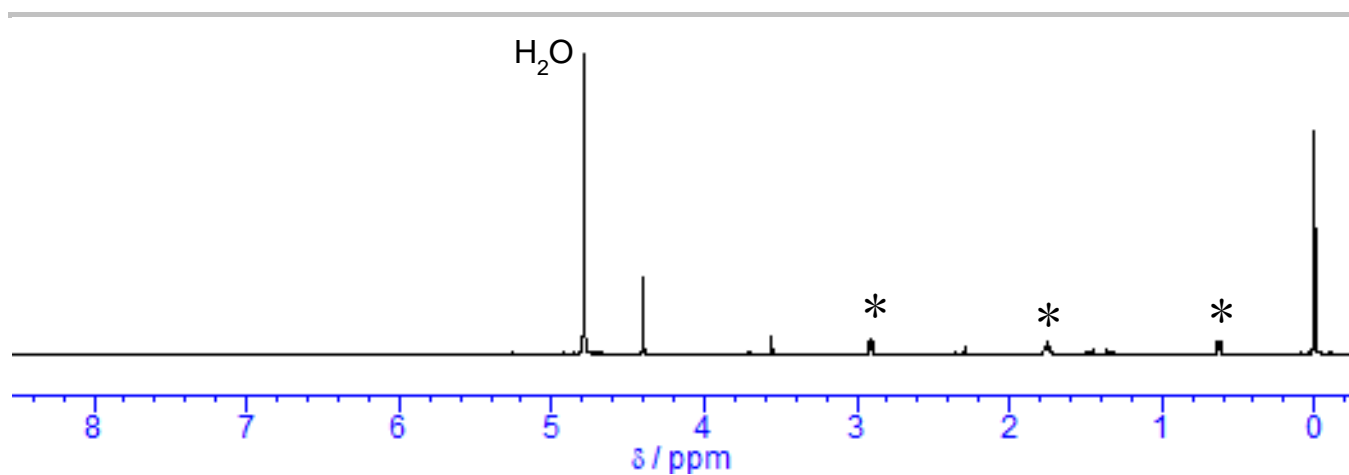

**Figure S10.** A full-range  $^1\text{H}$ -NMR chart of the reaction products in entry 5 of Table 1. The peaks indicated by \* and a peak at 0 ppm are derived from an internal standard 4,4-dimethyl-4-silapentane-1-sulfonic acid.

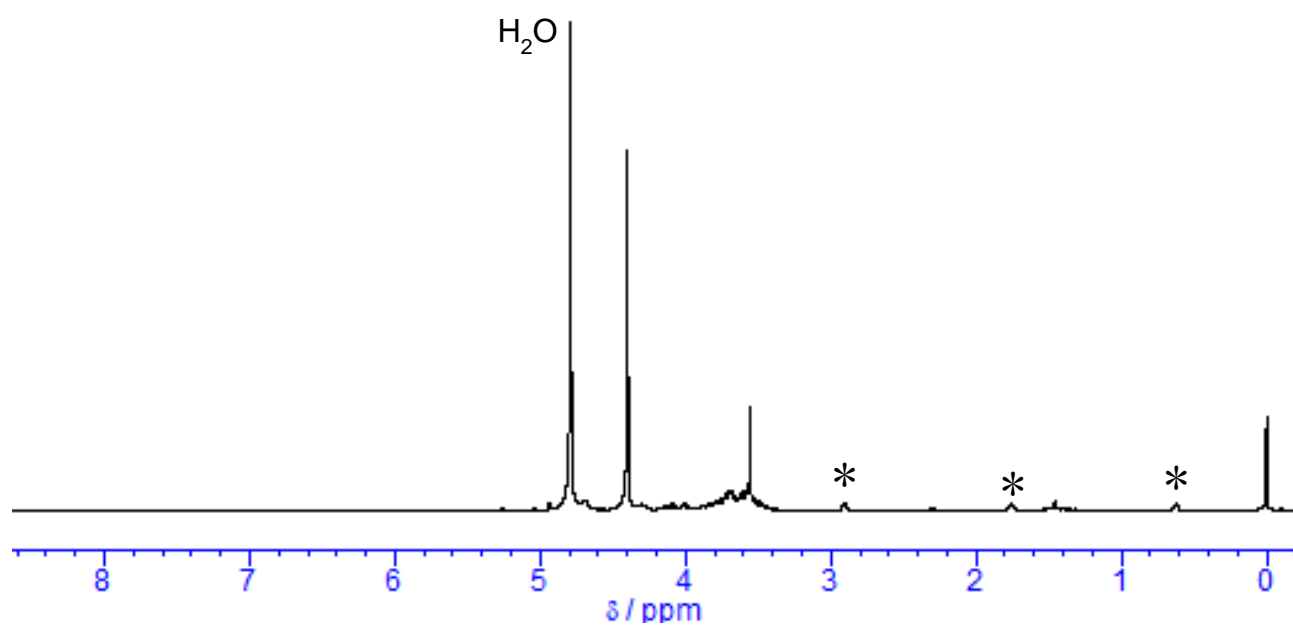

**Figure S11.** A full-range  $^1\text{H}$ -NMR chart of the reaction products in entry 3 of Table 1 (entry 1 of Table 2). The peaks indicated by \* and a peak at 0 ppm are derived from an internal standard 4,4-dimethyl-4-silapentane-1-sulfonic acid.

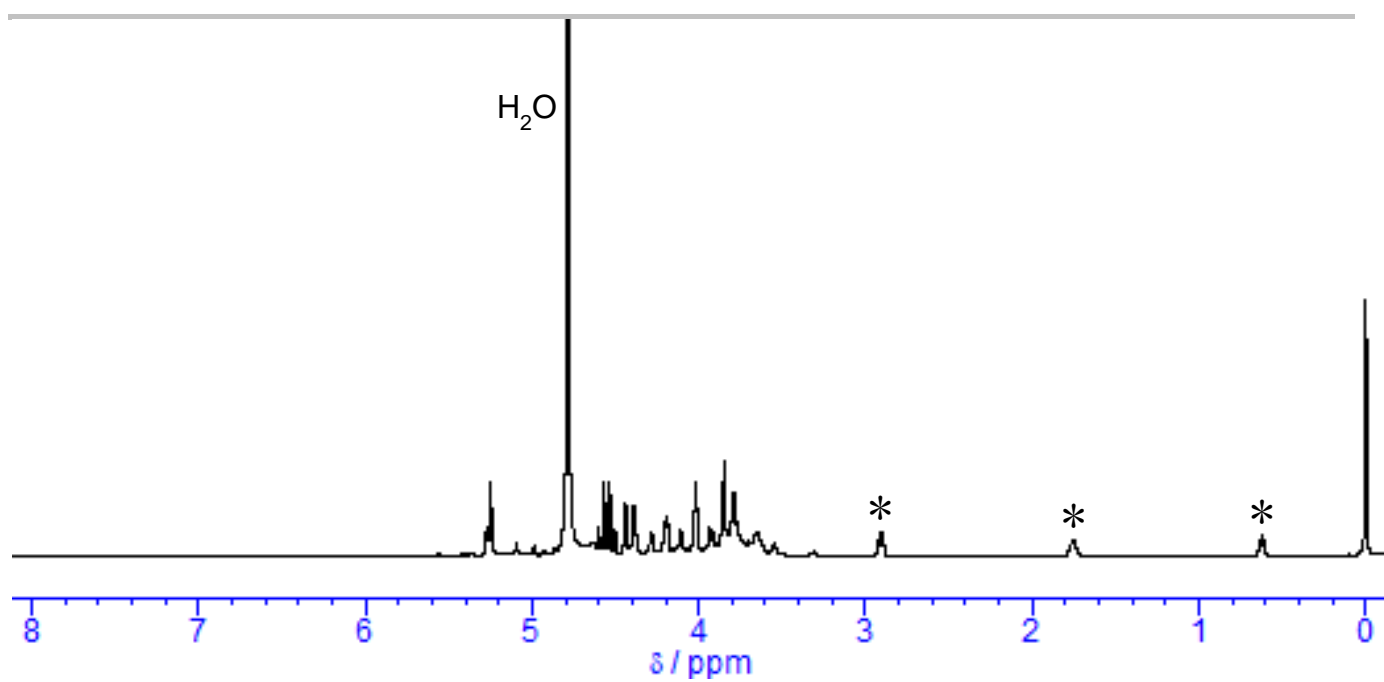

**Figure S12.** A full-range  $^1\text{H}$ -NMR chart of the reaction products in entry 2 of Table 2. The peaks indicated by \* and a peak at 0 ppm are derived from an internal standard 4,4-dimethyl-4-silapentane-1-sulfonic acid.

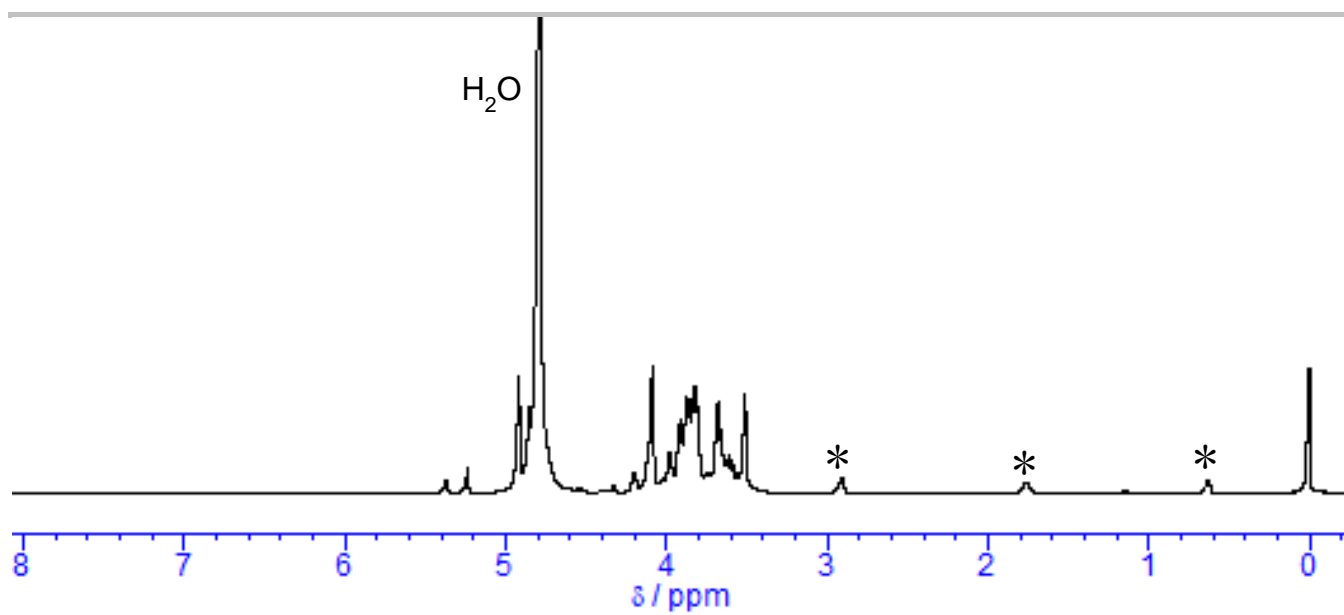

**Figure S13.** A full-range  $^1\text{H}$ -NMR chart of the reaction products in entry 3 of Table 2. The peaks indicated by \* and a peak at 0 ppm are derived from an internal standard 4,4-dimethyl-4-silapentane-1-sulfonic acid.

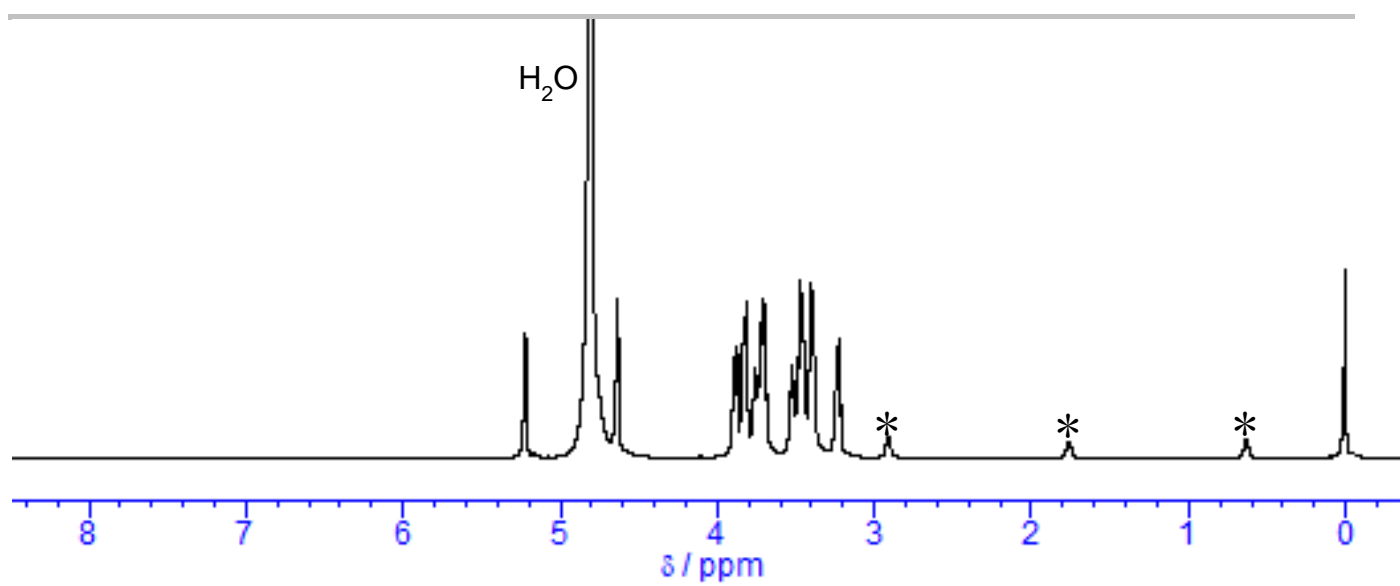

**Figure S14.** A full-range  $^1\text{H}$ -NMR chart of the reaction products in entry 4 of Table 2. The peaks indicated by \* and a peak at 0 ppm are derived from an internal standard 4,4-dimethyl-4-silapentane-1-sulfonic acid.

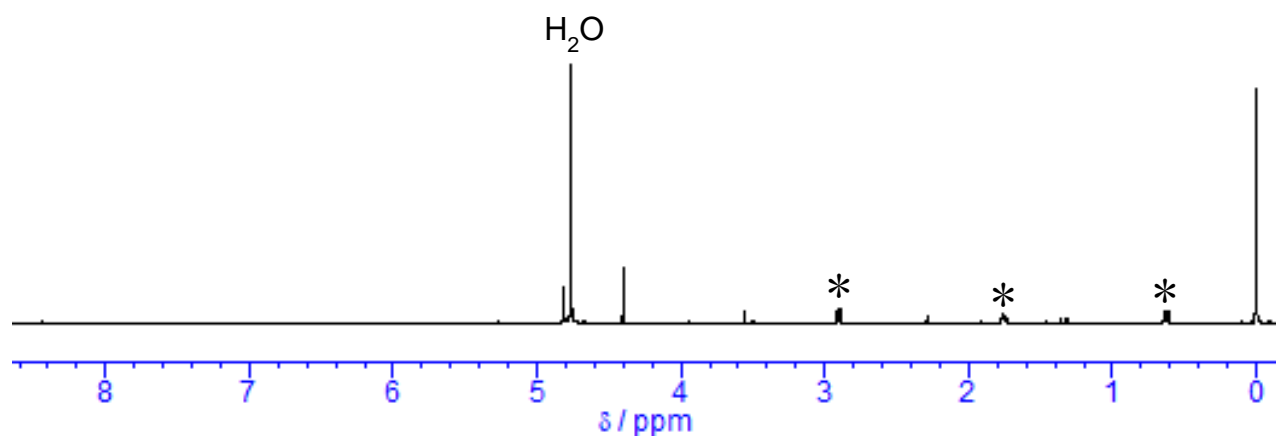

**Figure S15.** A full-range  $^1\text{H}$ -NMR chart of the reaction products in entry 4 of Table 3. The peaks indicated by \* and a peak at 0 ppm are derived from an internal standard 4,4-dimethyl-4-silapentane-1-sulfonic acid.



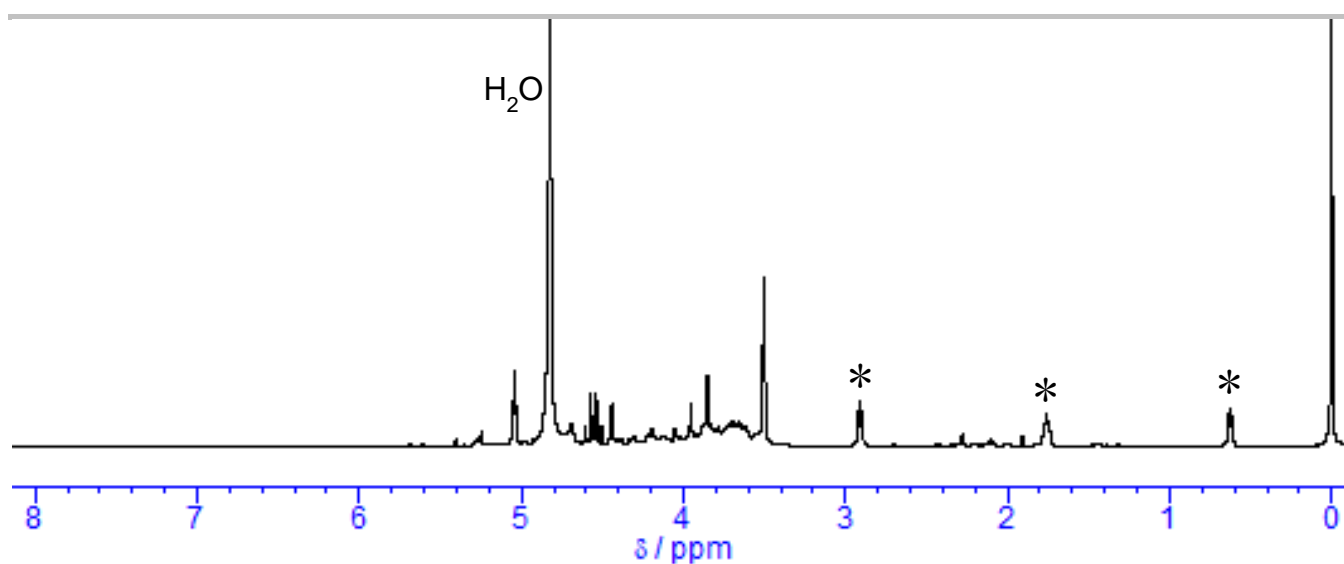

**Figure S16.** A full-range  $^1\text{H}$ -NMR chart of the products in the self-aldol reaction of glycolaldehyde. The peaks indicated by \* and a peak at 0 ppm are derived from an internal standard 4,4-dimethyl-4-silapentane-1-sulfonic acid.

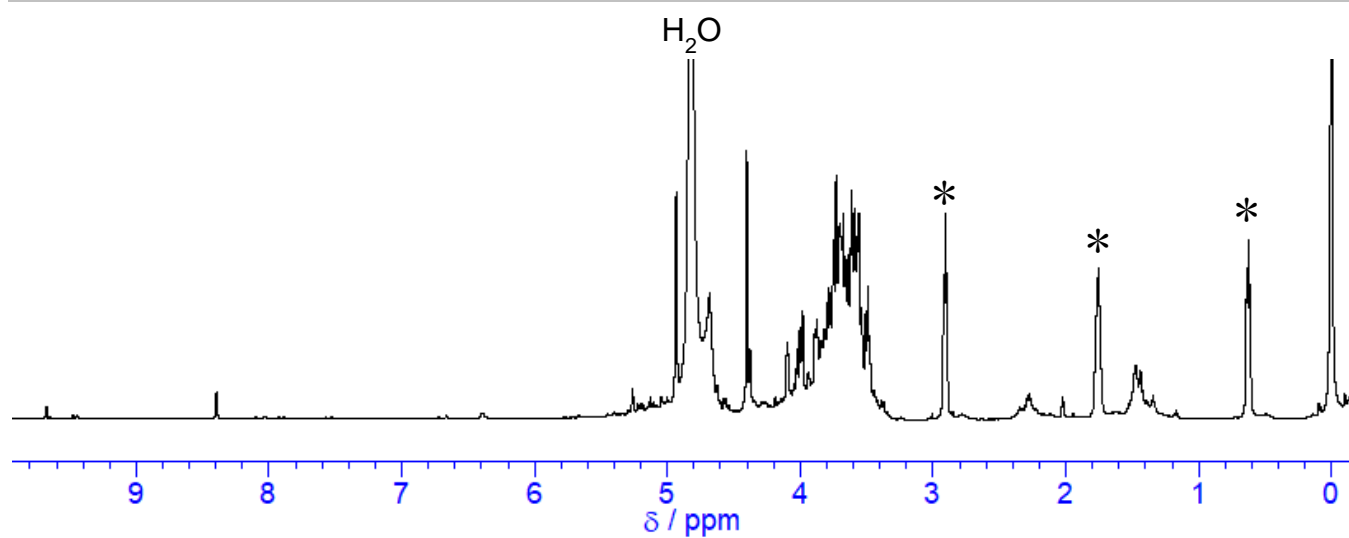

**Figure S17.** A full-range  $^1\text{H}$ -NMR chart of the HAp-catalyzed isomerization of glyceraldehyde in  $\text{D}_2\text{O}$ . The peaks indicated by \* and a peak at 0 ppm are derived from an internal standard 4,4-dimethyl-4-silapentane-1-sulfonic acid.
